# Supplementary material for: Facile synthesis of porous organic polymers bifunctionalized with azo and porphyrin groups
Source: Royal Society of Chemistry journal article supplement (doi:10.1039/c5ra19422a), 2015-01-01
Supplement: c5ra19422a1.pdf [file c5ra19422a1.pdf]

## Supporting Information

### **Facile synthesis of porous organic polymers bifunctionalized with azo and porphyrin groups**

Xiaowei Jiang, Yunfei Liu, Jun Liu, Yali Luo\* and Yinong Lyu\*

*State Key Laboratory of Materials-Oriented Chemical Engineering, College of Materials Science and Engineering, Nanjing Tech University, Nanjing 210009, P. R. China*

Tel: +86 25 83172114; Email: [yaliluo@njtech.edu.cn](mailto:yaliluo@njtech.edu.cn)

Tel: +86 25 83172118; Email: [yinonglu@njtech.edu.cn](mailto:yinonglu@njtech.edu.cn)

Table of content:

Fig. S1 FTIR spectra of azo-PPor-1 and the monomer.

Fig. S2 FTIR spectra of azo-PPor-2 and the monomer.

Fig. S3 FTIR spectra of azo-PPor-3 and the monomer.

Fig. S4 TGA plots of azo-PPors under nitrogen atmosphere.

Fig. S5 Powder X-ray diffraction of azo-PPors.

Fig. S6 SEM image of azo-PPor-1.

Fig. S7 SEM image of azo-PPor-2.

Fig. S8 SEM image of azo-PPor-3.

Fig. S9 Calculated Rouquerol plot of azo-PPors (Inset: enlarged plot turning part) along with pressure ranges used for the BET surface area calculations.

Fig. S10 BET plots of azo-PPors from nitrogen isotherms at 77 K.

Fig. S11 CO<sub>2</sub> adsorption isotherms of azo-PPors at 298 K.

Fig. S12 CH<sub>4</sub> adsorption isotherms of azo-PPors at 298 K.

Fig. S13 Initial slope fitting at 273 K for azo-PPor-1.

Fig. S14 Initial slope fitting at 273 K for azo-PPor-2.

Fig. S15 Initial slope fitting at 273 K for azo-PPor-3.

Table S1. Summary of surface area, CO<sub>2</sub> uptake and selectivity (CO<sub>2</sub>/CH<sub>4</sub>) (at 273 K) in selected porous materials.

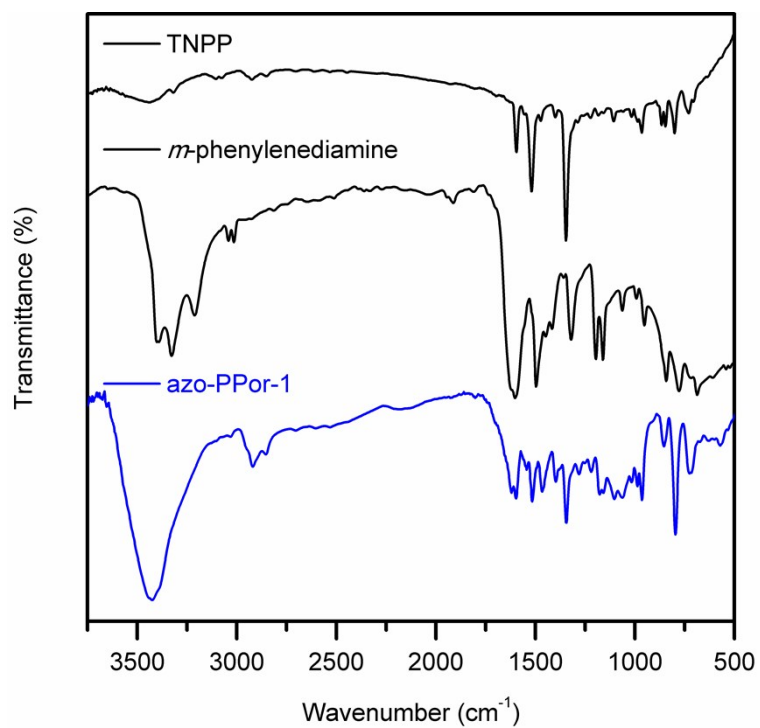

Fig. S1 FTIR spectra of azo-PPor-1 and the monomer.

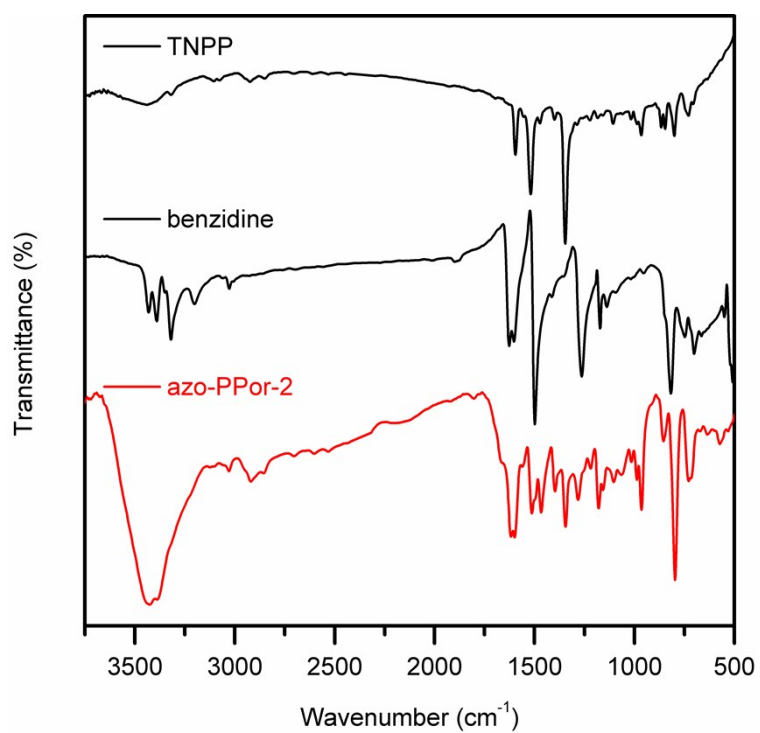

Fig. S2 FTIR spectra of azo-PPor-2 and the monomer.

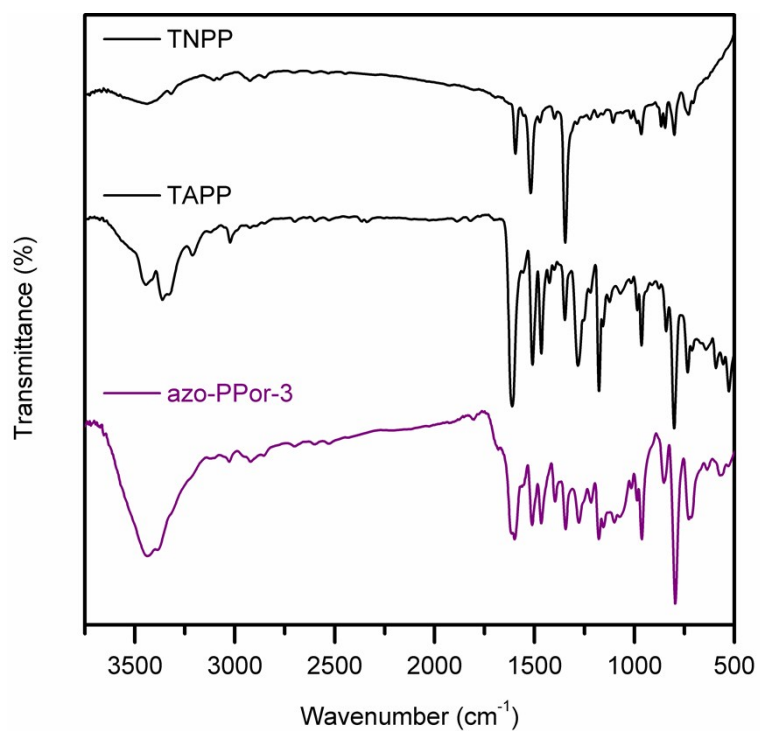

Fig. S3 FTIR spectra of azo-PPor-3 and the monomer.

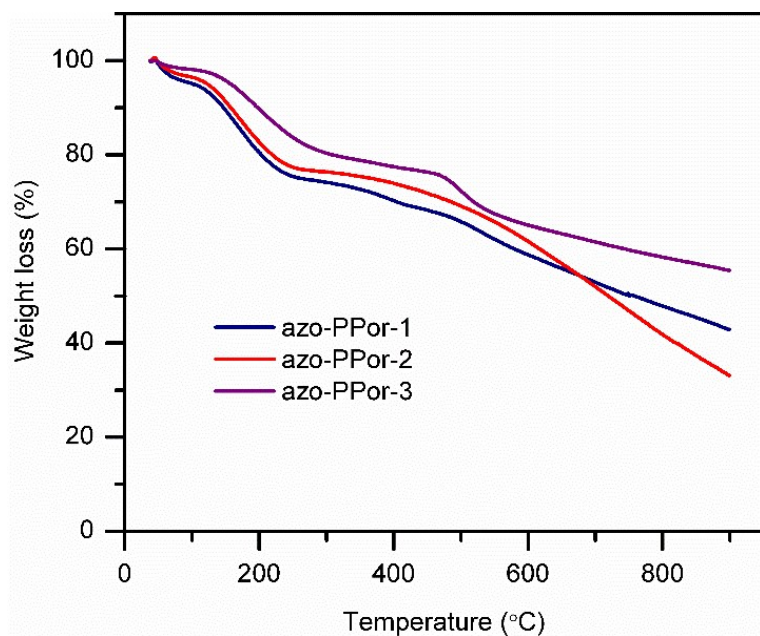

Fig. S4 TGA plots of azo-PPors under nitrogen atmosphere.

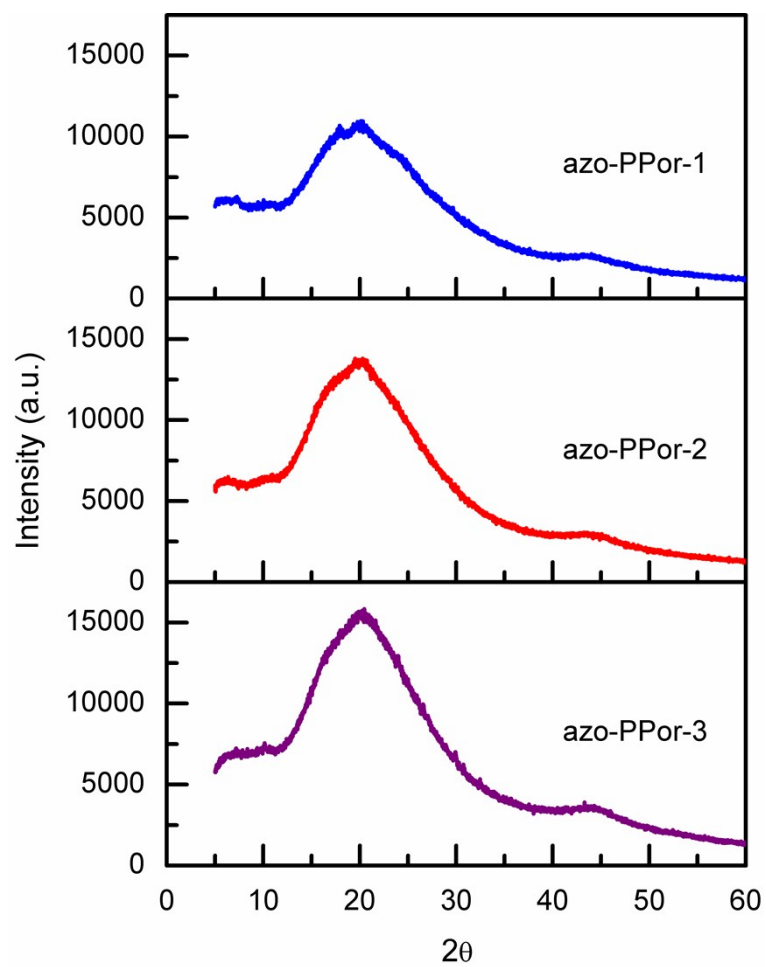

Fig. S5 Powder X-ray diffraction of azo-PPors.

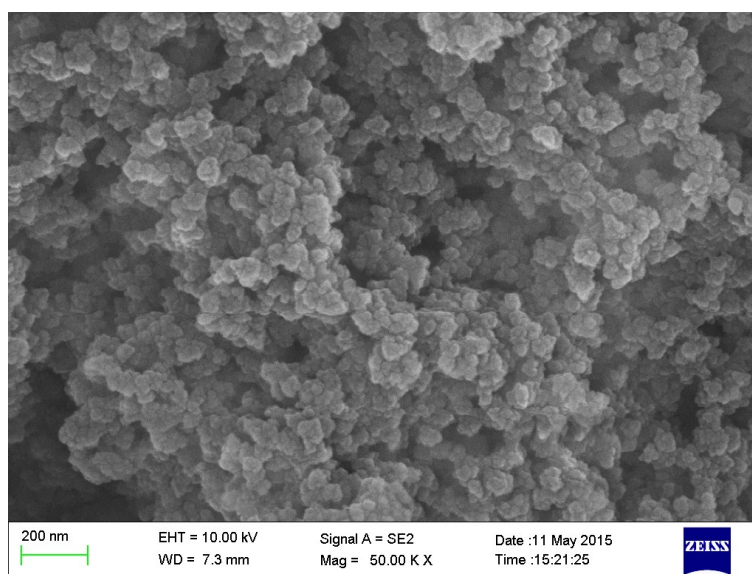

Fig. S6 SEM image of azo-PPor-1.

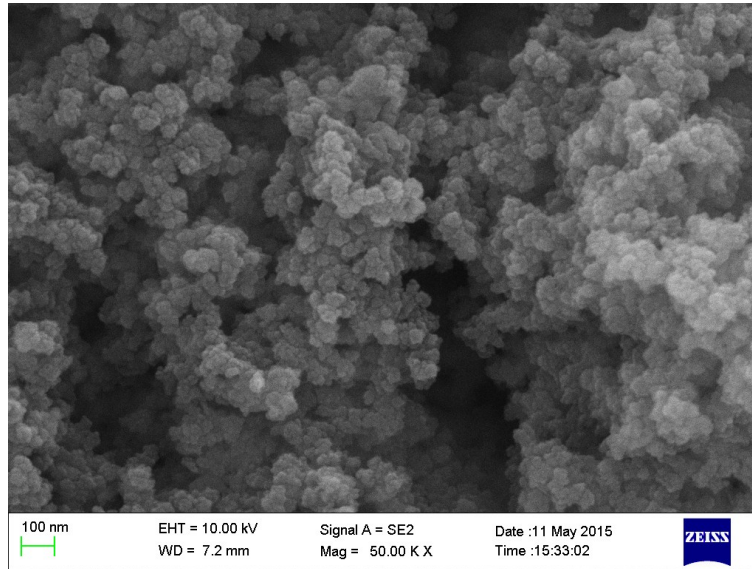

Fig. S7 SEM image of azo-PPor-2.

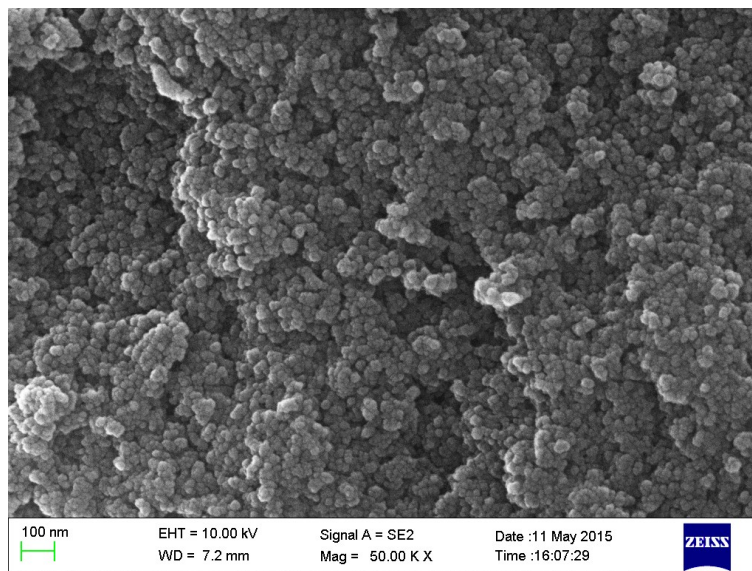

Fig. S8 SEM image of azo-PPor-3.

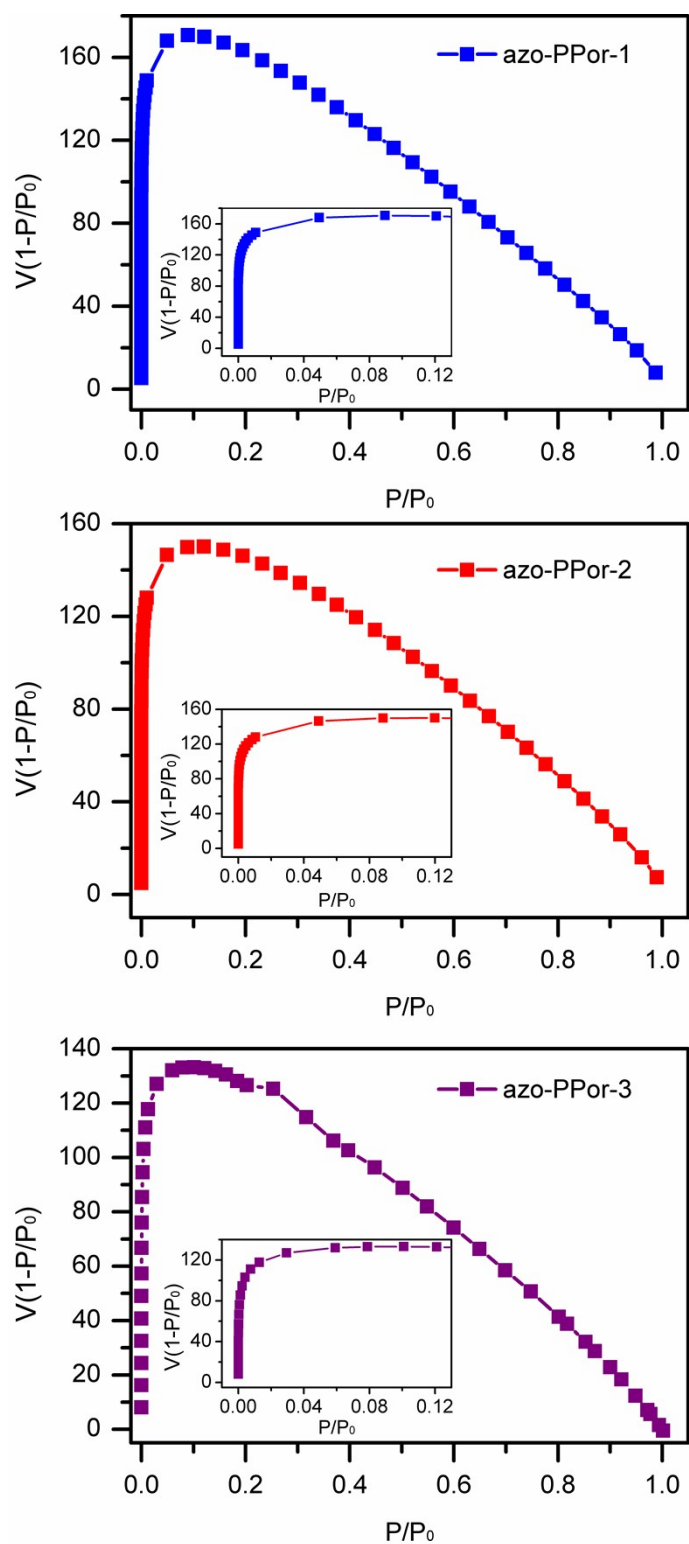

Fig. S9 Calculated Rouquerol plot of azo-PPors (Inset: enlarged plot turning part) along with pressure ranges used for the BET surface area calculations. We have used the pressure range where the term  $V(1-P/P_0)$  continuously increases with  $P/P_0$  for the surface area calculations.

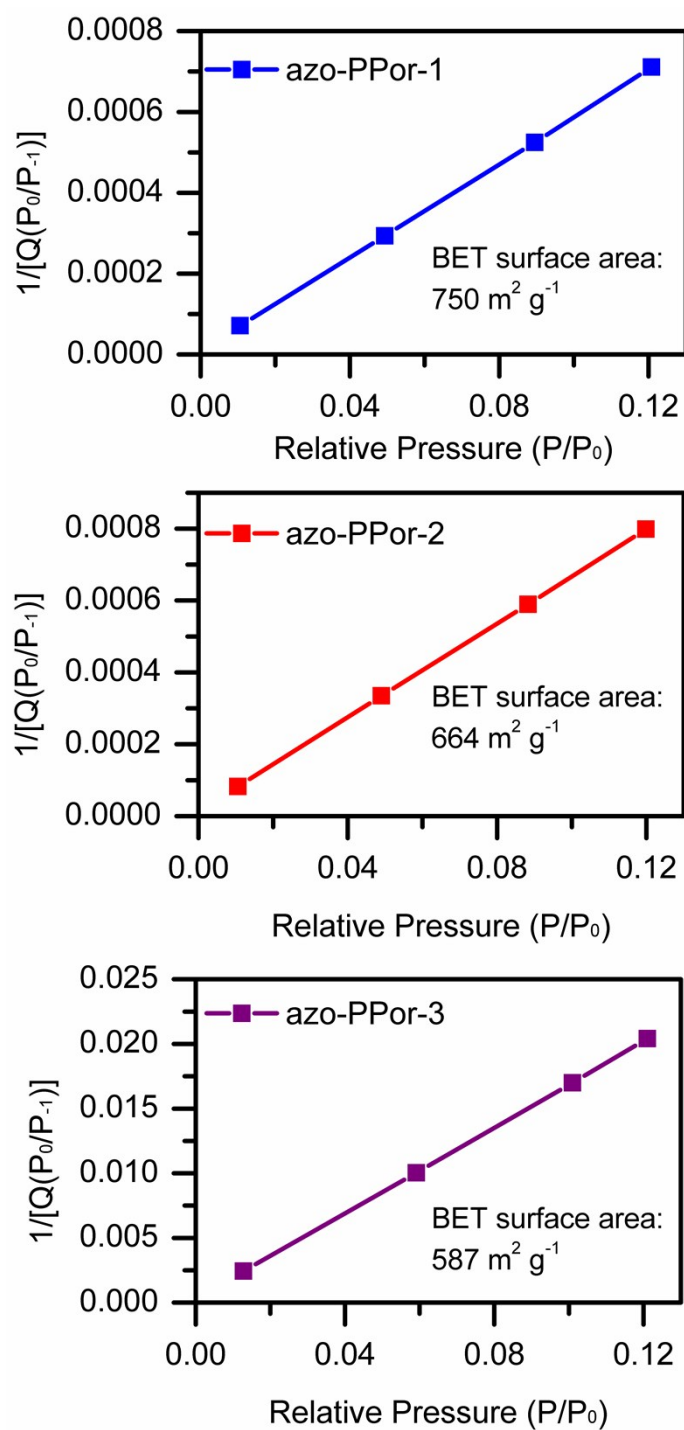

Fig. S10 BET plots of azo-PPors from nitrogen isotherms at 77 K. The selected points are located in the relative pressure ranges (between 0.01 and 0.12) determined according to the Rouquerol plots (see Fig. S9). Correlation coefficient R and C constant was 0.999965, 689.396 (azo-PPor-1), 0.999992, 492.264 (azo-PPor-2) and 0.999977, 602.625 (azo-PPor-3).



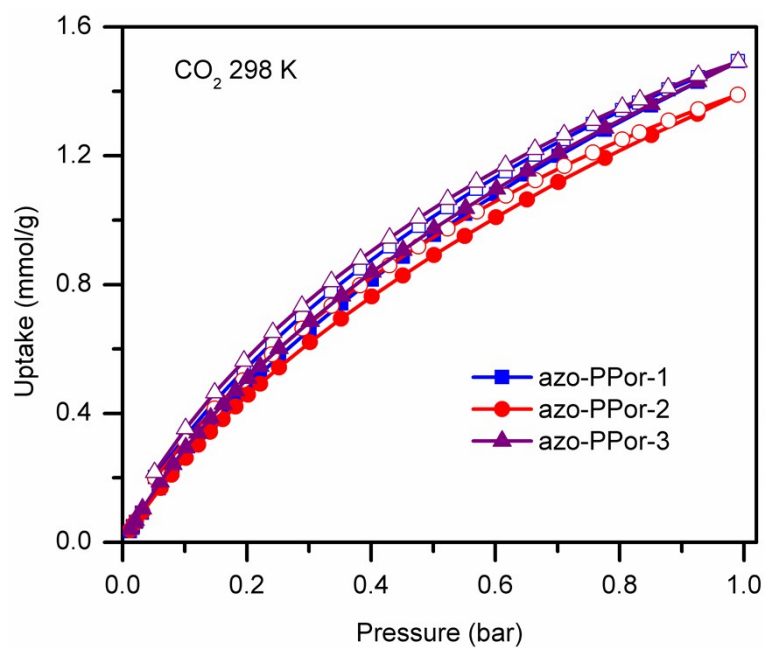

Fig. S11 CO<sub>2</sub> adsorption isotherms of azo-PPors at 298 K.

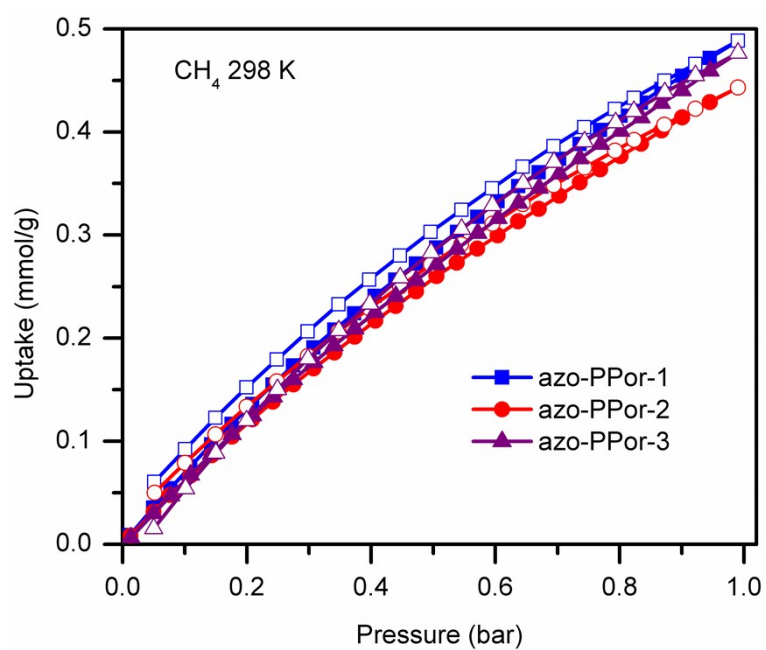

Fig. S12 CH<sub>4</sub> adsorption isotherms of azo-PPors at 298 K.

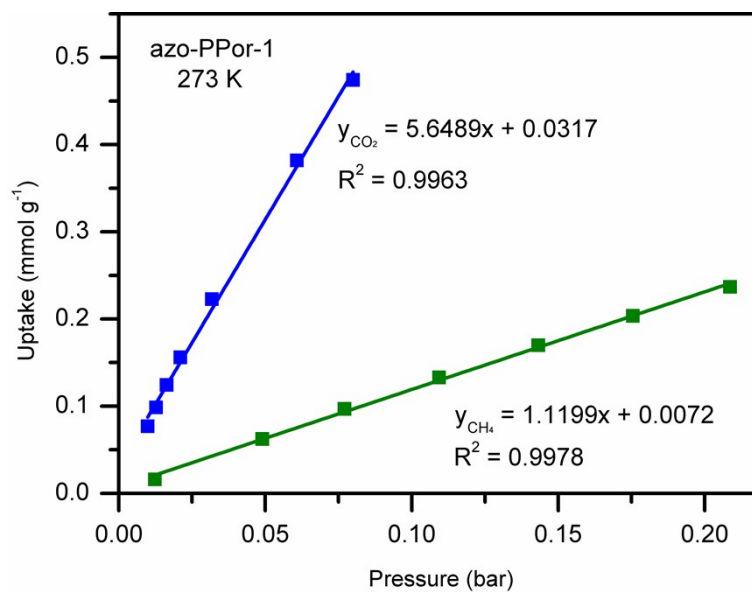

Fig. S13 Initial slope fitting at 273 K for azo-PPor-1.

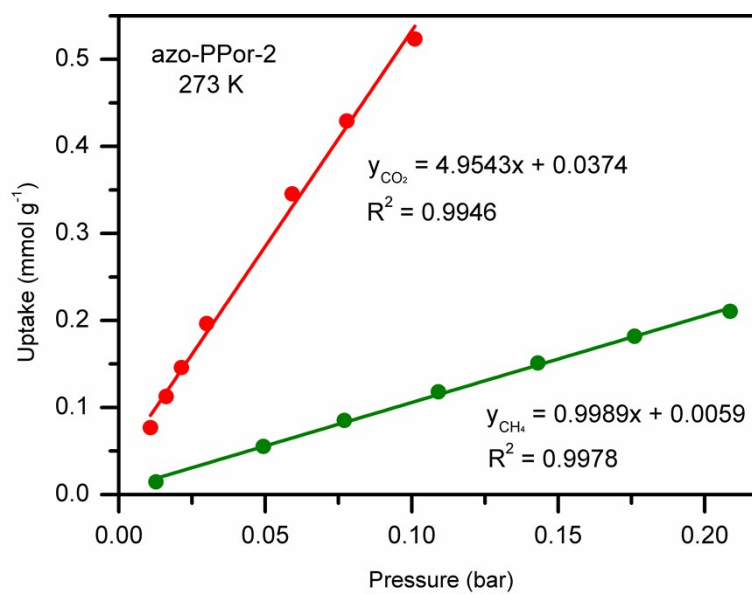

Fig. S14 Initial slope fitting at 273 K for azo-PPor-2.

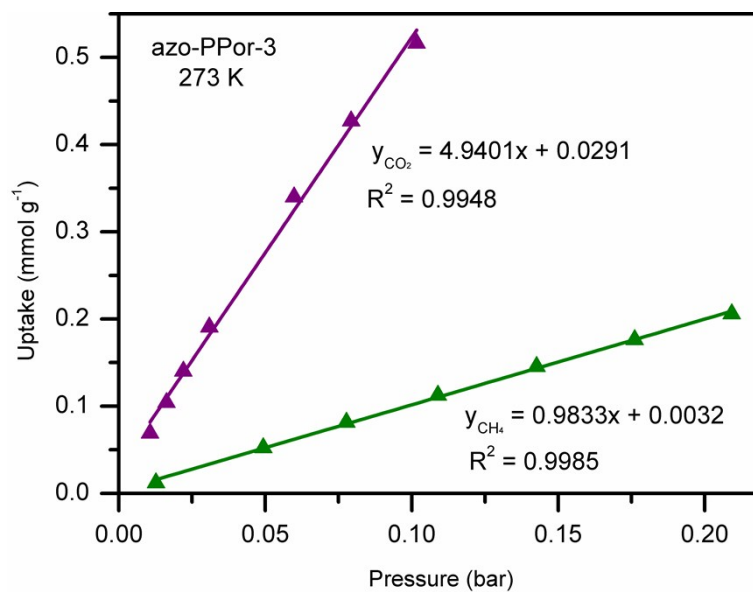

Fig. S15 Initial slope fitting at 273 K for azo-PPor-3.

Table S1. Summary of surface area, CO<sub>2</sub> uptake and selectivity (CO<sub>2</sub>/CH<sub>4</sub>) (at 273 K) in selected porous materials.

| Material               | BET<br>(m <sup>2</sup> g <sup>-1</sup> ) | CO <sub>2</sub> uptake<br>(mmol g <sup>-1</sup> ) | Selectivity<br>(CO <sub>2</sub> /CH <sub>4</sub> ) | reference |
|------------------------|------------------------------------------|---------------------------------------------------|----------------------------------------------------|-----------|
| azo-Ppor-1             | 750                                      | 2.45                                              | 5.04                                               | this work |
| azo-Ppor-2             | 664                                      | 2.23                                              | 4.96                                               | this work |
| azo-Ppor-3             | 587                                      | 2.16                                              | 5.02                                               | this work |
| P-1                    | 611                                      | 2.02                                              | 4.0                                                | [1]       |
| P-2                    | 1222                                     | 3.30                                              | 3.0                                                | [1]       |
| Cz-POF-1               | 2065                                     | 4.59                                              | 4.4                                                | [2]       |
| Cz-POF-2               | 671                                      | 1.75                                              | 4.7                                                | [2]       |
| Cz-POF-3               | 1927                                     | 4.77                                              | 4.4                                                | [2]       |
| Cz-POF-4               | 914                                      | 2.75                                              | 7.1                                                | [2]       |
| PPTBC                  | 917                                      | 2.93                                              | 5.1                                                | [3]       |
| PMTBC                  | 704                                      | 2.86                                              | 5.6                                                | [3]       |
| PPETBC                 | 702                                      | 2.23                                              | 4.0                                                | [3]       |
| PMETBC                 | 540                                      | 1.96                                              | 4.6                                                | [3]       |
| NPOF-4                 | 1249                                     | 2.50                                              | 3                                                  | [4]       |
| NPOF-4-NO <sub>2</sub> | 337                                      | 2.42                                              | 15                                                 | [4]       |
| NPOF-4-NH <sub>2</sub> | 554                                      | 2.90                                              | 11                                                 | [4]       |
| BPL carbon             | 1150                                     | 2.09                                              | 3.9                                                | [5]       |

## References

- [1] S. Qiao, Z. Du and R. Yang, *J. Mater. Chem. A*, 2014, **2**, 1877-1885.
- [2] X. Zhang, J. Lu and J. Zhang, *Chem. Mater.*, 2014, **26**, 4023-4029.
- [3] X. Wang, Y. Zhao, L. Wei, C. Zhang, X. Yang, M. Yu and J.-X. Jiang, *Macromol. Chem. Phys.*, 2014, **216**, 504-510.
- [4] T. Islamoglu, M. Gulam Rabbani and H. M. El-Kaderi, *J. Mater. Chem. A*, 2013, **1**, 10259-10266.
- [5] A. Phan, C. J. Doonan, F. J. Uribe-Romo, C. B. Knobler, M. O'keeffe and O. M. Yaghi, *Acc. Chem. Res.*, 2010, **43**, 58-67.
